# Supplementary material for: SO2 capture enhancement due to confined methanol within MIL-53(Al)-TDC
Source: Royal Society of Chemistry journal article supplement (doi:10.1039/d2dt03105a), 2022-11-24
Supplement: d2dt03105a1.pdf [file d2dt03105a1.pdf]

*Supporting Information for:*

## **SO<sub>2</sub> capture enhancement due to confined methanol within MOF Material MIL-53(Al)-TDC.**

J. Antonio Zárate,<sup>a</sup> Eduardo González-Zamora,<sup>b</sup> Ilich A. Ibarra<sup>\*,c</sup>, Gabriela Díaz<sup>\*,a</sup>.

<sup>a</sup> Instituto de Física, Universidad Nacional Autónoma de México, Apartado Postal 20-364, Ciudad de México 0100, México

<sup>b</sup> Departamento de Química, Universidad Autónoma Metropolitana-Iztapalapa, San Rafael Atlixco 186, Col. Vicentina, Iztapalapa, C. P. 09340, Ciudad de México, México.

<sup>c</sup> Laboratorio de Fisicoquímica y Reactividad de Superficies (LaFReS), Instituto de Investigaciones en Materiales, Universidad Nacional Autónoma de México, Circuito Exterior s/n, CU, Del. Coyoacán, 04510, Ciudad de México, Mexico. E-mail: argel@unam.mx.

\* Corresponding Authors

## Table of Contents

|                                            |       |    |
|--------------------------------------------|-------|----|
| <b>S1. Experimental details.</b>           | ..... | S3 |
| <b>S2. SO<sub>2</sub> adsorption data.</b> | ..... | S5 |
| <b>S3. Computational studies</b>           | ..... | S5 |
| <b>S4. References</b>                      | ..... | S8 |

## S1. Experimental Details

### Materials synthesis

Reagents were purchased from commercial suppliers and used without further purification.

MIL-53(Al)-TDC, was synthesised according to the protocol reported in the literature.<sup>1</sup> A solution of H<sub>2</sub>BDC (62 mg, 0.036 mmol) and AlCl<sub>3</sub> (64 mg, 0.048 mmol) in DMF (1.8 mL) and H<sub>2</sub>O (2.5 mL) was heated up at 100 °C for 5 hours inside of 20 mL pressure tube. Then, at the end of the reaction time, the reaction mixture was cooled down to room temperature, the reaction crude was filtered under vacuum and washed with DMF to obtained as-MIL-53(Al)-TDC. The activation process involved heating the sample up at 150 °C for 1 hour to obtain as-MIL- 53(Al)-TDC. Then, acetone-exchange was applied to remove DMF molecules, and the sample was heated up at 200 °C under vacuum for 4 hours. This product was characterized by PXRD and N<sub>2</sub> adsorption.

### PXRD

Powder X-Ray Diffraction Patterns (PXRD) were recorded on a Rigaku Diffractometer, Ultima IV with a Cu-K $\alpha$ <sub>1</sub> radiation ( $\lambda = 1.5406 \text{ \AA}$ ) using a nickel filter. Patterns were recorded in the 25–50° 2 $\theta$  range with a step scan of 0.02° and a scan rate of 0.08° min<sup>-1</sup>.

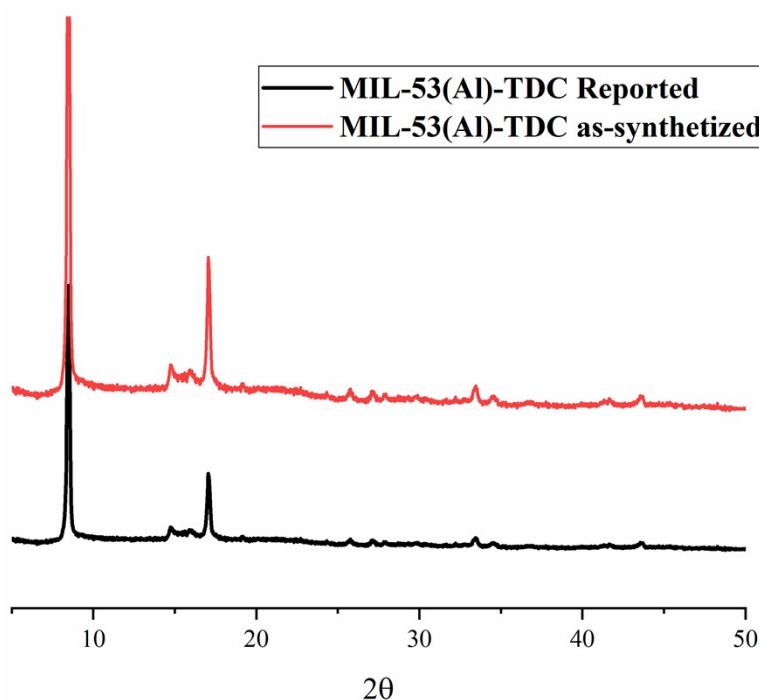

**Figure S1.** Experimental (red line) and reported<sup>1</sup> (black line) powder X-ray diffraction (PXRD) patterns for as-MIL-53(Al)-TDC.

### Nitrogen adsorption isotherm

N<sub>2</sub> isotherms (up to  $P/P_0 = 1$  and 77 K) were recorded on a Quantachrome Autosorb MP-1 equipment under high vacuum in a clean system with a diaphragm pumping system.

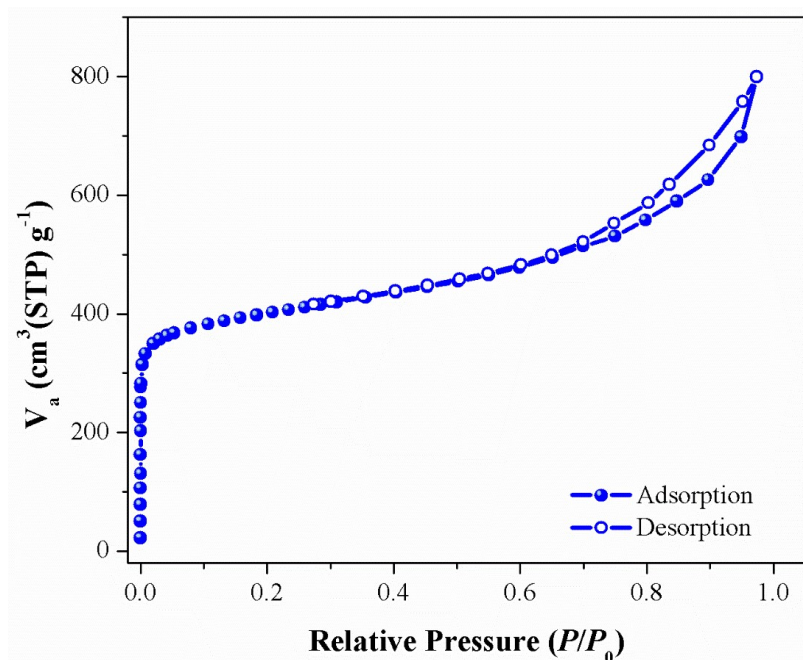

**Figure S2.** N<sub>2</sub> adsorption isotherm at 77 K of the as-synthesized MIL-53(Al)-TDC.

### MeOH@MIL-53(Al)-TDC sample preparation:

Samples of acetone-exchanged MIL-53(Al)-TDC were placed in a quartz sample holder inside a DVS Advantage 1 microbalance module, and activated at 453 K for 2 h. After that time, the samples were cooled down to room temperature (under a flow of N<sub>2</sub>). Once activated, each sample was soaked in methanol vapour with the help of the previously mentioned device, selecting different values of partial pressure (2.26, 2.46, 2.68 and 2.76 %  $P/P_0$ ) in order to achieve the desired weight percentage for this investigation (2.05 wt %). The change in mass of the samples was monitored until the total mass reached a value consistent with the desired mass percentage of confined alcohol.

## Results and Discussion

### S2. SO<sub>2</sub> adsorption data

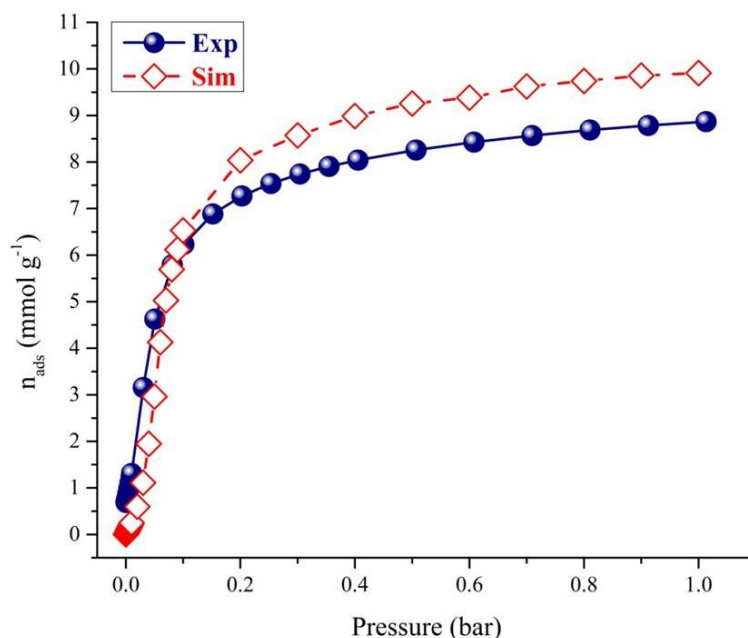

**Figure S3.** Comparison between the experimental (filled blue circles) and the GCMC simulated (open red rhombus) SO<sub>2</sub> adsorption isotherms at 298 K.

### S3. Computational studies

#### Microscopic models for MIL-53(Al)-TDC, SO<sub>2</sub> and MeOH interatomic potential.

Initial atomic coordinates for MIL-53(Al)-TDC were taken from a previously reported study<sup>1</sup>. The Lennard-Jones (LJ) parameters for the organic and inorganic parts for MIL-53(Al)-TDC were taken from the DREIDING<sup>2</sup> force field and the UFF<sup>3</sup> force field respectively. The partial atomic charges for each framework atom of MIL-53(Al)-TDC were extracted from periodic Density Functional Theory (DFT) calculations using the ESP<sup>4</sup> method as implemented in Dmol<sup>3</sup> and the Perdew–Burke–Ernzerhof (PBE)<sup>5</sup> functional and the DNP<sup>6</sup> basis set. The SO<sub>2</sub> molecule was represented by the atomistic model reported by Ketko *et. al.*<sup>7</sup> This corresponds to a rigid model where both three charged LJ sites are centered in the atomic positions, with a S-O bond of 1.432 Å and a O-S-O bond angle of 119.3°. On the other hand, the MeOH was represented by the CHARMM model<sup>8</sup>. This model has six charged LJ sites centered in the atomic positions, with a C-H bond of 1.111 Å and a H-C-H bond angle of 108.4°, additionally the model has the bond distances for C-O bond of 1.42 Å and O-H bond of 0.96 Å and the C-O-H angle of 106.0°. The MOFs-SO<sub>2</sub>/MeOH interactions were

described using a 12-6 LJ potential and a coulombic contribution. Using a general approach adopted in previous studies,<sup>9</sup> the H atom from the  $\mu$ -OH group and the Al atoms interacts with the guest molecules only through electrostatic interactions. LJ crossed parameters between the MOF material and the guest molecules were calculated with the Lorentz-Berthelot mixing rules. A cut off distance of 12 Å was used for the LJ contributions, while the long-range electrostatic interactions were handled with the Ewald summation technique.<sup>10</sup>

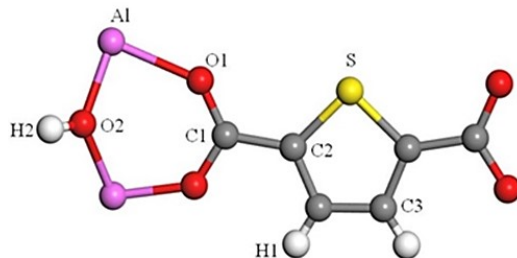

**Fig. S4.** Labels of the atoms for the organic and inorganic parts of MIL-53(Al)-TDC.

**Table S1.** LJ potential parameters and charges for the atoms of the MIL-53(Al)-TDC.

| Atom Type | $\epsilon$ (K) | $\sigma$ (Å) | Charge |
|-----------|----------------|--------------|--------|
| Al        | 0              | 4.0081       | 1.78   |
| S         | 137.88         | 3.5948       | 0.08   |
| C1        | 47.856         | 3.4729       | 0.58   |
| C2        | 47.856         | 3.4729       | -0.11  |
| C3        | 46.856         | 3.4729       | -0.16  |
| O1        | 48.158         | 3.0331       | -0.54  |
| O2        | 30.193         | 3.1181       | -1.03  |
| H1        | 7.6489         | 2.8464       | 0.145  |
| H2        | 0              | 2.5711       | 0.42   |

**Table S2.** LJ potential parameters and charges for the atoms of the SO<sub>2</sub> and MeOH.

| Atom Type | $\epsilon$ (K) | $\sigma$ (Å) | Charge |
|-----------|----------------|--------------|--------|
| S_so2     | 73.800         | 3.3900       | 0.590  |
| O_so2     | 79.000         | 3.0500       | -0.295 |
| CH3       | 39.251         | 3.6527       | -0.390 |

|            |        |        |        |
|------------|--------|--------|--------|
| <b>HC3</b> | 12.077 | 2.3875 | 0.090  |
| <b>OH</b>  | 96.668 | 3.1449 | -0.650 |
| <b>HO</b>  | 23.148 | 0.4000 | 0.419  |

---

The simulation box consisted of 16 unit cells (2×4×2) for MIL-53(Al)-TDC, by fixing all atoms of the framework in their initial positions. All Monte Carlo (MC) simulations were performed using the simulation code CADSS (Complex Adsorption and Diffusion Simulation Suite),<sup>11</sup> using  $2.0 \times 10^7$  MC steps for each pressure point. MC simulations in the  $\mu$ VT ensemble were carried out at 298 K to predict the adsorption behavior of SO<sub>2</sub> in the range of 0.0001 to 1 bar. The fugacity used for each of the simulations was calculated using the Peng-Robinson equation of state. Complementary MC simulations were carried out in the NVT ensemble at 298 K to explore the preferential adsorption sites of SO<sub>2</sub> at low, intermediate and high loading. These studies involved the analysis of the radial distribution functions plotted between different MOF/guest atoms pairs calculated for hundreds of MC configurations. The adsorption enthalpies at low coverage were also calculated using the revised Widom test particle insertion.<sup>12</sup>

## Radial Distribution Functions

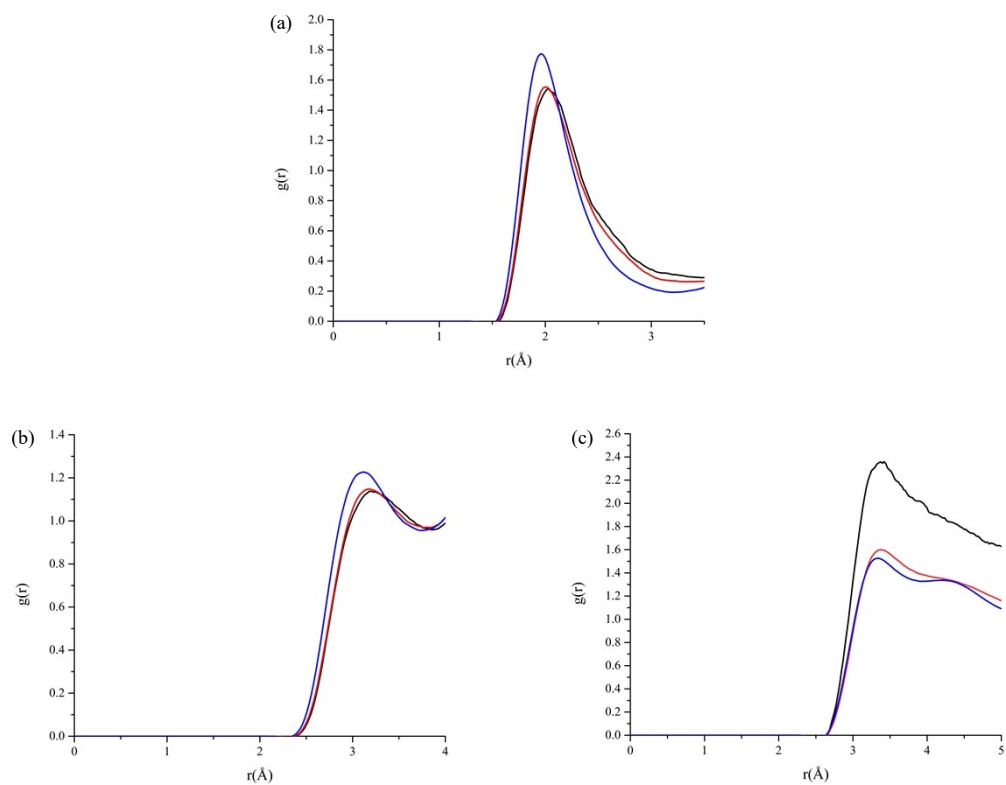

**Fig. S5.** Radial distribution functions obtained from the MC simulations in MIL-53(Al)-TDC for the pair (a)  $\text{H}_\mu\text{-OH-OSO}_2$ , (b)  $\text{H}_{\text{org}}\text{-OSO}_2$  and (c)  $\text{S}_{\text{SO}_2}\text{-OSO}_2$  at different loads of  $\text{SO}_2$ . (1.1 mmol  $\text{g}^{-1}$ , black; 5.0 mmol  $\text{g}^{-1}$ , red; 9.1 mmol  $\text{g}^{-1}$ , blue).

## S6. References

- [1] C. B. L. Tschense, N. Reimer, C. W. Hsu, H. Reinsch, R. Siegel, W. J. Chen, C. H. Lin, A. Cadiau, C. Serre, J. Senker and N. Stock, New Group 13 MIL-53 Derivates Based on 2,5-Thiophenedicarboxylic Acid. *Zeitschrift für Anorg. und Allg. Chemie*, **2017**, 643 (21), 1600–1608.
- [2] S. L. Mayo, B. D. Olafson and W. A. Goddard, DREIDING: A Generic Force Field for Molecular Simulations, *J. Phys. Chem.*, **1990**, 94, 26, 8897.
- [3] A. K. Rappe, C. J. Casewit, K. S. Colwell, W. A. Goddard and W. M. Skiff, UFF, A Full periodic table force field for molecular Mechanics and Molecular Dynamics Simulations, *J. Am. Chem. Soc.*, **1992**, 114, 25 10024.
- [4] S. Hamad, S. R. G. Balestra, R. Bueno-Perez, S. Calero and A. R. Ruiz-Salvador, Atomic Charges for Modeling Metal-Organic Frameworks: Why and How., *J. Solid State Chem.*, **2015**, 223, 144–151.
- [5] J. P. Perdew, K. Burke and M. Ernzerhof, Generalized Gradient Approximation Made Simple., *Phys. Rev. Lett.*, **1996**, 77 (18), 3865–3868.
- [6] W. J. Hehre, R. Ditchfield and J. A. Pople, Self-Consistent Molecular Orbital Methods. XII. Further Extensions of Gaussian-Type Basis Sets for Use in Molecular Orbital Studies of Organic Molecules Published by the AIP Publishing Articles You May Be Interested in Self-consistent Molecular Orbit., **1977**, 2257 (1972).
- [7] J. J. Potoff, M. B. H. Ketko and G. Kamath, Development of an Optimized Intermolecular Potential for Sulfur Dioxide., *Comput. Mol. Sci. Eng. Forum - Core Program. Top. 2011 AIChE Annu. Meet.*, **2011**, 228–229.
- [8] S. Jo, T. Kim, V. G. Iyer and W. Im, CHARMM-GUI: A web-based graphical user interface for CHARMM, *J. Comput. Chem.*, 2008, 29, 1859-1865.
- [9] (a) E. Sánchez-González, P. G. M. Mileo, J. R. Álvarez, E. González-Zamora, G. Maurin and I. A. Ibarra, Confined Methanol within InOF-1: CO<sub>2</sub> Capture Enhancement., *Dalt. Trans.*, **2017**, 46 (44), 15208–15215. Damasceno Borges, P. Normand, A. Permiakova, R. Babarao, N. Heymans, D. S. Galvao, C. Serre, G. De Weireld and G. Maurin, Gas Adsorption and Separation by the Al-Based Metal-Organic Framework MIL-160., *J. Phys. Chem. C*, **2017**, 121 (48), 26822–26832. (c) E. Sánchez-González, P. G. M. Mileo, M. Sagastuy-Breña, J. R. Álvarez, J. E. Reynolds, A. Villarreal, A. Gutiérrez-Alejandre, J. Ramírez, J. Balmaseda, E. González-Zamora, G. Maurin, S. M. Humphrey and I. A. Ibarra, Highly Reversible Sorption of H<sub>2</sub>S and CO<sub>2</sub> by an Environmentally Friendly Mg-Based MOF., *J. Mater. Chem. A*, **2018**, 6 (35), 16900–16909. (d) J. A. Zárate, E. Sánchez-González, D. R. Williams, E. González-Zamora, V. Martis, A. Martínez, J. Balmaseda, G. Maurin and I. A.

Ibarra, High and Energy-Efficient Reversible SO<sub>2</sub> Uptake by a Robust Sc(III)-Based MOF., *J. Mater. Chem. A*, **2019**, 7 (26), 15580–15584.

[10] J. Kolafa and J. W. Perram, Cutoff Errors in the Ewald Summation Formulae for Point Charge Systems., *Mol. Simul.*, **1992**, 9 (5), 351–368.

[11] Q. Yang, D. Liu, C. Zhong and Jian-Rong Li., Development of Computational Methodologies for Metal–Organic Frameworks and Their Application in Gas Separations., *Chem. Rev.*, **2013**, 113(10), 8261–8323.

[12] T. J. H. Vlugt, E. García-Pérez, D. Dubbeldam, S. Ban and S. Calero, Computing the Heat of Adsorption Using Molecular Simulations: The Effect of Strong Coulombic Interactions., *J. Chem. Theory Comput.*, **2008**, 4 (7), 1107–1118.
